# Supplementary material for: Synthesis, Characterization of Chitosan-Aluminum Oxide Nanocomposite for Green Synthesis of Annulated Imidazopyrazol Thione Derivatives
Source: PubMed Central journal article supplement (PMC8038599; doi:10.3390/polym13071160), 2021-04-05
Supplement: polymers-13-01160-s001.pdf [file polymers-13-01160-s001.pdf]

# Synthesis, Characterization of Chitosan-Aluminum Oxide Nanocomposite for Green Synthesis of Annulated Imidazopyrazol Thione Derivatives

Abir S. Abdel-Naby <sup>1,2,\*</sup>, Sara Nabil <sup>1,2</sup>, Sarah Aldulaijan <sup>1,2</sup>, Ibtisam M. Ababutain <sup>2,3</sup>, Azzah I. Alghamdi <sup>2,3</sup> Somaiah Almubayedh <sup>2</sup> and Khaled D. Khalil <sup>4,5</sup>

<sup>1</sup> Department of Chemistry, College of Science, Imam Abdulrahman Bin Faisal University, P.O. Box 1982, Dammam 31441, Saudi Arabia; snabil@iau.edu.sa (S.N.); saaldulaijan@iau.edu.sa (S.A.)

<sup>2</sup> Water Treatment Unit, Basic & Applied Scientific Research Center (BASRC), Imam Abdulrahman Bin Faisal University, P.O. Box 1982, Dammam 31441, Saudi Arabia; iababutain@iau.edu.sa (I.M.A.); azalghamdi@iau.edu.sa (A.I.A.); almubay@uwindsor.ca (S.A.)

<sup>3</sup> Department of Biology, College of Science, Imam Abdulrahman Bin Faisal University, P.O. Box 1982, Dammam 31441, Saudi Arabia

<sup>4</sup> Department of Chemistry, Faculty of Science, Cairo University, Giza 12613, Egypt; kh.khalil@yahoo.com

<sup>5</sup> Department of Chemistry, Faculty of Science, Taibah University, Al-Madinah Almunawrah, Yanbu 46423, Saudi Arabia

\* Correspondence: aabdelnaby@iau.edu.sa

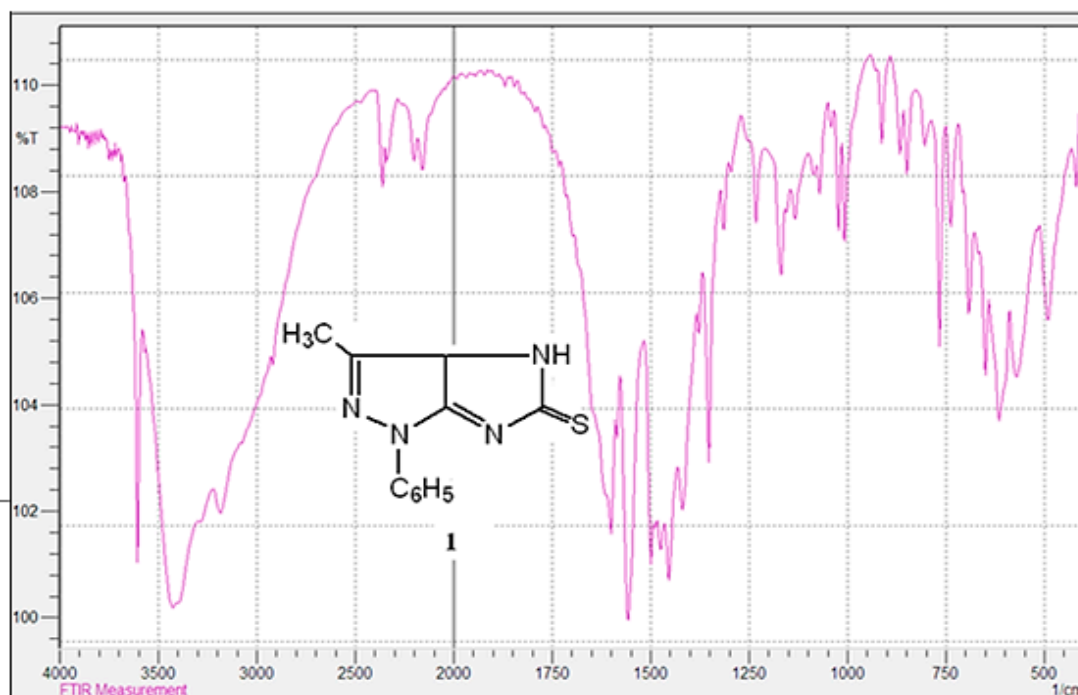

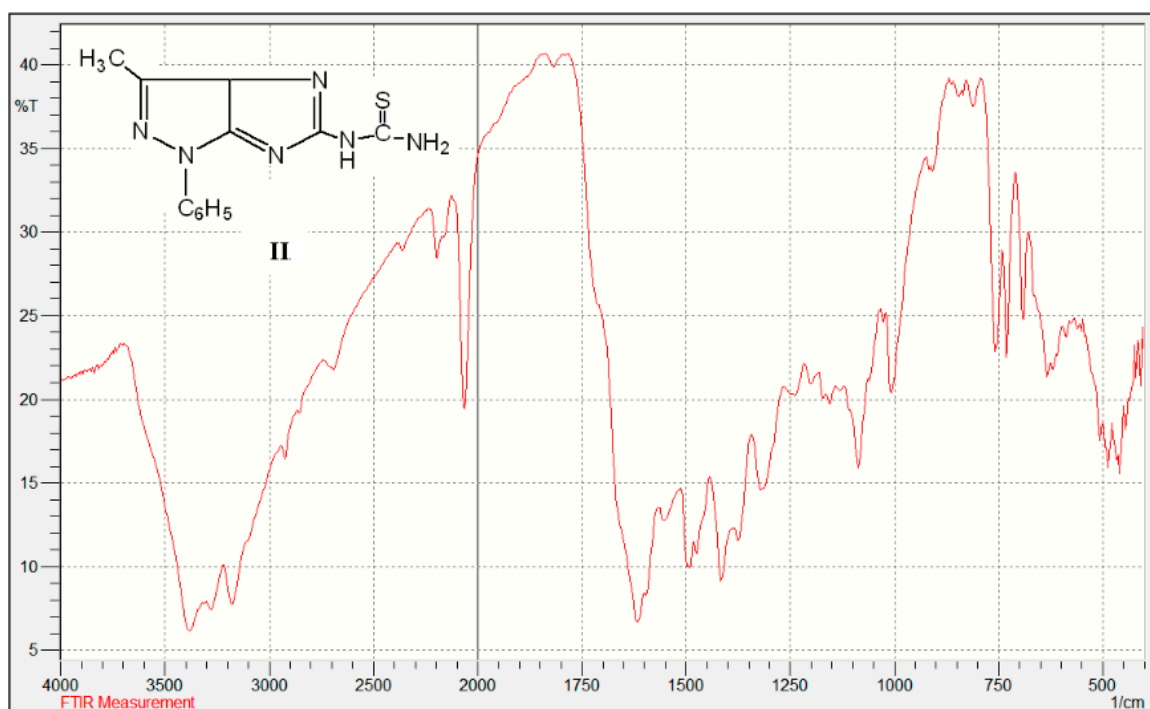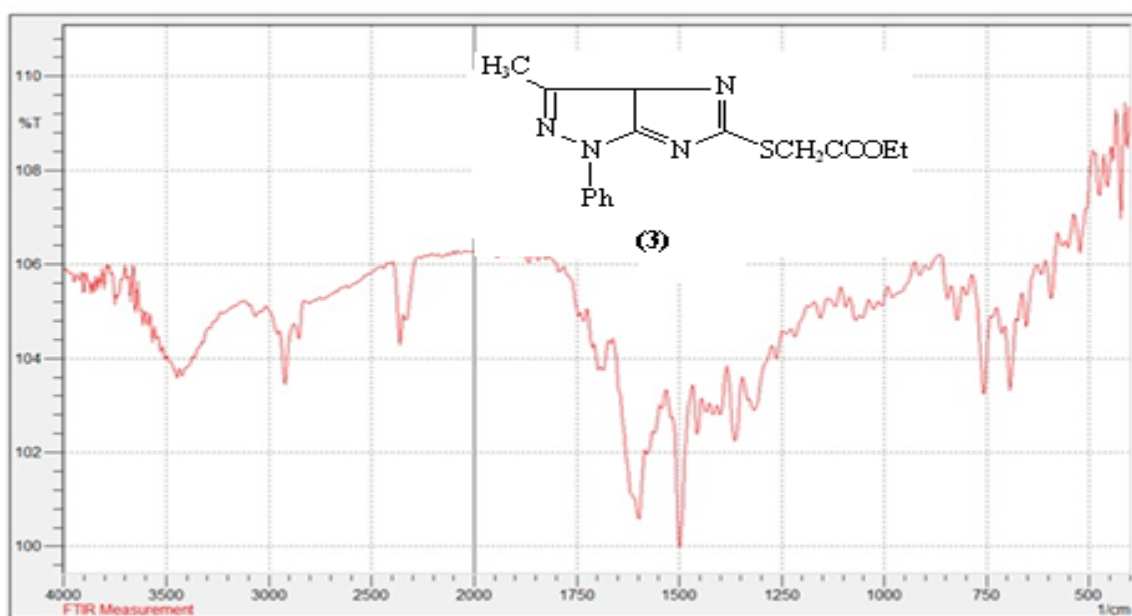

Figure S1. FTIR of various imidazo pyrazolyl thione derivatives.

**Table S1.** Following the formation of the derivatives by TLC.

| <b>Product</b> | <b>Yield</b>                                                  | <b>TLC</b>                                                                    | <b>Reaction time</b> | <b>m.p.</b>                    |
|----------------|---------------------------------------------------------------|-------------------------------------------------------------------------------|----------------------|--------------------------------|
| <b>1</b>       | <b>90 %</b><br>Mass<br>Trial 1 = 0.8 g<br>Trial 2 = 1.2 g     | 1 : 1<br>Diethyl ether : n-hexane                                             | 2 h                  | 125–127 °C /<br>Orange powder  |
| <b>2</b>       | <b>85 %</b><br>Mass<br>Trial 1 = 0.650 g                      | 1 : 1<br>Diethyl ether : n-hexane<br>(band of SM within the range of product) | 18 h                 | 146–148 °C /<br>Orange crystal |
| <b>3</b>       | <b>85 %</b><br>Mass<br>Trial 1 = 0.722 g<br>Trial 2 = 0.695 g | 1 : 1<br>Diethyl ether : n-hexane                                             | 6 h                  | 189–191 °C /<br>Brown powder   |
